# Supplementary material
Source: Royal Society of Chemistry journal article supplement (doi:10.1039/d6ce00202a)
Supplement: d6ce00202a1.pdf [file d6ce00202a1.pdf]

Supplementary Information (SI) for CrystEngComm.  
This journal is © The Royal Society of Chemistry 2026

## Electronic Supplementary Information

### **Dative and Noncovalent Tetrel Bonding in Hemidirected Pb(II) Complexes with Thiosemicarbazone and Hydrazone Ligands: Significance in Crystal Packing and Computational Insights into Pb $\cdots$ N/S/O Interactions**

Suman Adhikari,<sup>a\*</sup> Sourav Nath,<sup>a,b</sup> Werner Kaminsky,<sup>c</sup> Sebastian Krajewski,<sup>c</sup> Rahul Shukla,<sup>d\*</sup>  
and Subhadip Roy<sup>e\*</sup>

<sup>a</sup>*Department of Chemistry, Govt. Degree College, Dharmanagar, Tripura(N)-799253, India.*

<sup>b</sup>*Department of Chemistry and Vivekananda Centre for Research, Ramakrishna Mission Residential College, Narendrapur, Kolkata-700103, India.*

<sup>c</sup>*Department of Chemistry, University of Washington, Seattle, Washington 98195, United States.*

<sup>d</sup>*Department of Chemistry (NCI Laboratory), School of Science, GITAM (Deemed to be University), Visakhapatnam, PIN-530045, Andhra Pradesh, India*

<sup>e</sup>*Department of Chemistry, The ICFAI University Tripura, Agartala, Tripura 799210, India.*

\*Corresponding author.

E-mail: sumanadhi@gmail.com (S.A) ; rshukla2@gitam.edu (R.S) ; sroy199@gmail.com (S.R)

**Table S1** Crystallographic Data and Details of Refinements for Pb(II) complexes **1** and **2**.

| Identification code                                          | Complex <b>1</b>                                                                 | Complex <b>2</b>                                                                |
|--------------------------------------------------------------|----------------------------------------------------------------------------------|---------------------------------------------------------------------------------|
| Empirical formula                                            | C <sub>18</sub> H <sub>23</sub> ClN <sub>8</sub> O <sub>4</sub> PbS <sub>2</sub> | C <sub>30</sub> H <sub>32</sub> SN <sub>6</sub> O <sub>9</sub> Pb <sub>2</sub>  |
| Formula weight                                               | 722.2                                                                            | 1067.05                                                                         |
| Temperature/K                                                | 100(2)                                                                           | 100(2)                                                                          |
| Crystal system                                               | triclinic                                                                        | monoclinic                                                                      |
| Space group                                                  | <i>P</i> -1                                                                      | <i>P</i> 2 <sub>1</sub> / <i>n</i>                                              |
| <i>a</i> /Å                                                  | 10.4182(10)                                                                      | 11.4145(3)                                                                      |
| <i>b</i> /Å                                                  | 10.9215(10)                                                                      | 15.5121(5)                                                                      |
| <i>c</i> /Å                                                  | 12.9047(12)                                                                      | 18.7691(6)                                                                      |
| $\alpha$ /°                                                  | 78.837(4)                                                                        | 90                                                                              |
| $\beta$ /°                                                   | 69.941(4)                                                                        | 100.922(2)                                                                      |
| $\gamma$ /°                                                  | 61.540(4)                                                                        | 90                                                                              |
| Volume/Å <sup>3</sup>                                        | 1211.8(2)                                                                        | 3263.11(17)                                                                     |
| <i>Z</i>                                                     | 2                                                                                | 4                                                                               |
| $\rho_{\text{calc}}$ /cm <sup>3</sup>                        | 1.979                                                                            | 2.172                                                                           |
| $\mu$ /mm <sup>-1</sup>                                      | 7.287                                                                            | 10.433                                                                          |
| <i>F</i> (000)                                               | 700.0                                                                            | 2024.0                                                                          |
| Crystal size/mm <sup>3</sup>                                 | 0.22 × 0.09 × 0.03                                                               | 0.04 × 0.04 × 0.005                                                             |
| Radiation                                                    | MoK $\alpha$ ( $\lambda$ = 0.71073)                                              | MoK $\alpha$ ( $\lambda$ = 0.71073)                                             |
| 2 $\theta$ range for data collection/°                       | 3.362 to 64.296                                                                  | 3.432 to 50.694                                                                 |
| Index ranges                                                 | -15 ≤ <i>h</i> ≤ 15,<br>-16 ≤ <i>k</i> ≤ 16,<br>-19 ≤ <i>l</i> ≤ 19              | -13 ≤ <i>h</i> ≤ 13,<br>-18 ≤ <i>k</i> ≤ 18,<br>-22 ≤ <i>l</i> ≤ 22             |
| Reflections collected                                        | 48194                                                                            | 11602                                                                           |
| Independent reflections                                      | 8509 [ <i>R</i> <sub>int</sub> = 0.0607,<br><i>R</i> <sub>sigma</sub> = 0.0387]  | 5968 [ <i>R</i> <sub>int</sub> = 0.0403,<br><i>R</i> <sub>sigma</sub> = 0.0511] |
| Data/restraints/parameters                                   | 8509/0/321                                                                       | 5968/12/444                                                                     |
| Goodness-of-fit on <i>F</i> <sup>2</sup>                     | 1.057                                                                            | 1.015                                                                           |
| Final <i>R</i> indexes [ <i>I</i> ≥ 2 $\sigma$ ( <i>I</i> )] | <i>R</i> <sub>1</sub> = 0.0210,<br><i>wR</i> <sub>2</sub> = 0.0507               | <i>R</i> <sub>1</sub> = 0.0356,<br><i>wR</i> <sub>2</sub> = 0.0816              |
| Final <i>R</i> indexes [all data]                            | <i>R</i> <sub>1</sub> = 0.0223,<br><i>wR</i> <sub>2</sub> = 0.0512               | <i>R</i> <sub>1</sub> = 0.0575,<br><i>wR</i> <sub>2</sub> = 0.0889              |
| Largest diff. peak/hole / e Å <sup>-3</sup>                  | 1.25/-1.40                                                                       | 1.89/-1.75                                                                      |

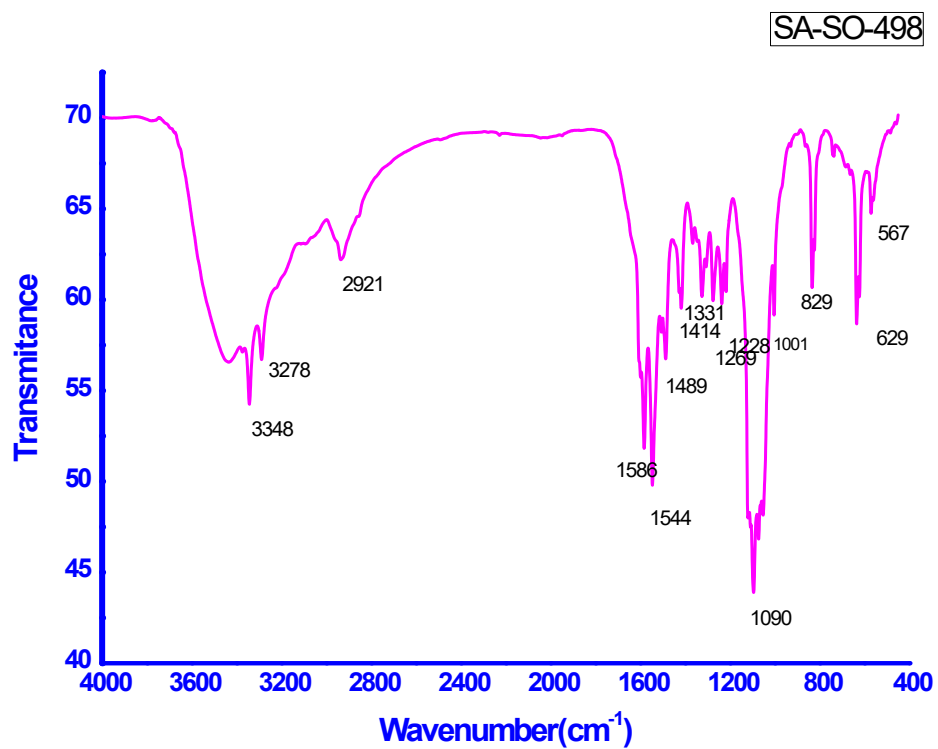

**Fig. S1** FT-IR spectrum of Pb(II) complex **1**.

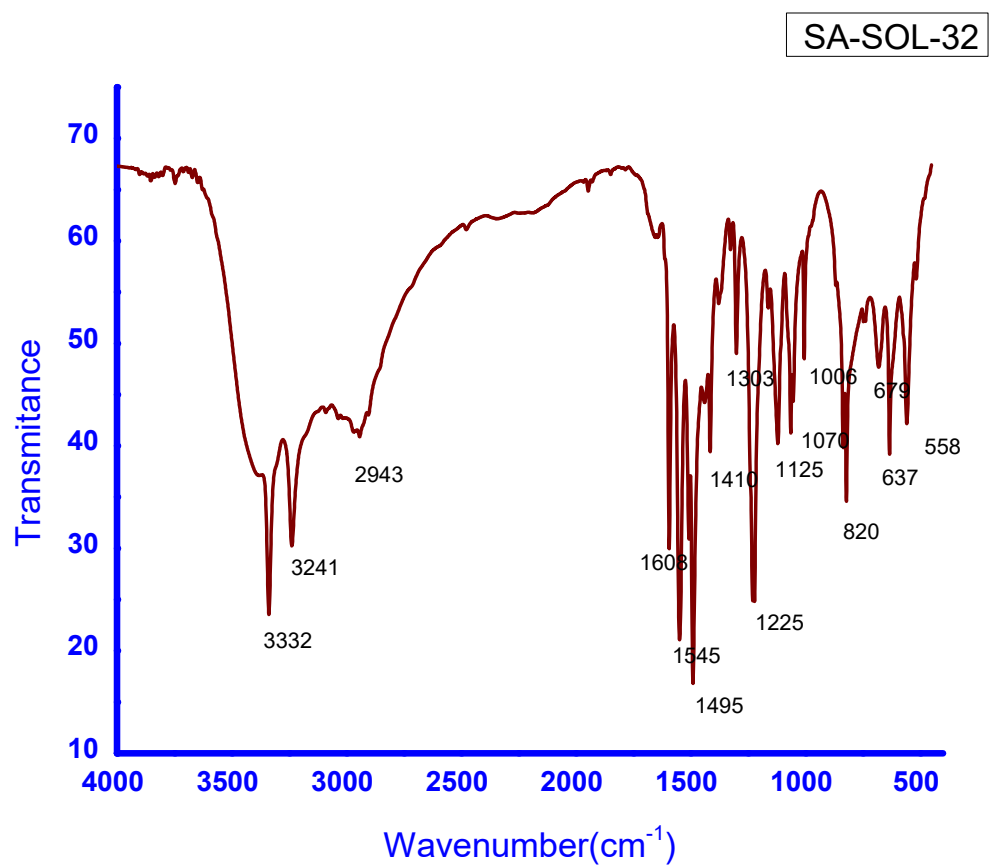

**Fig. S2** FT-IR spectrum of thiosemicarbazone-based ligand (H<sub>2</sub>L<sup>1</sup>).

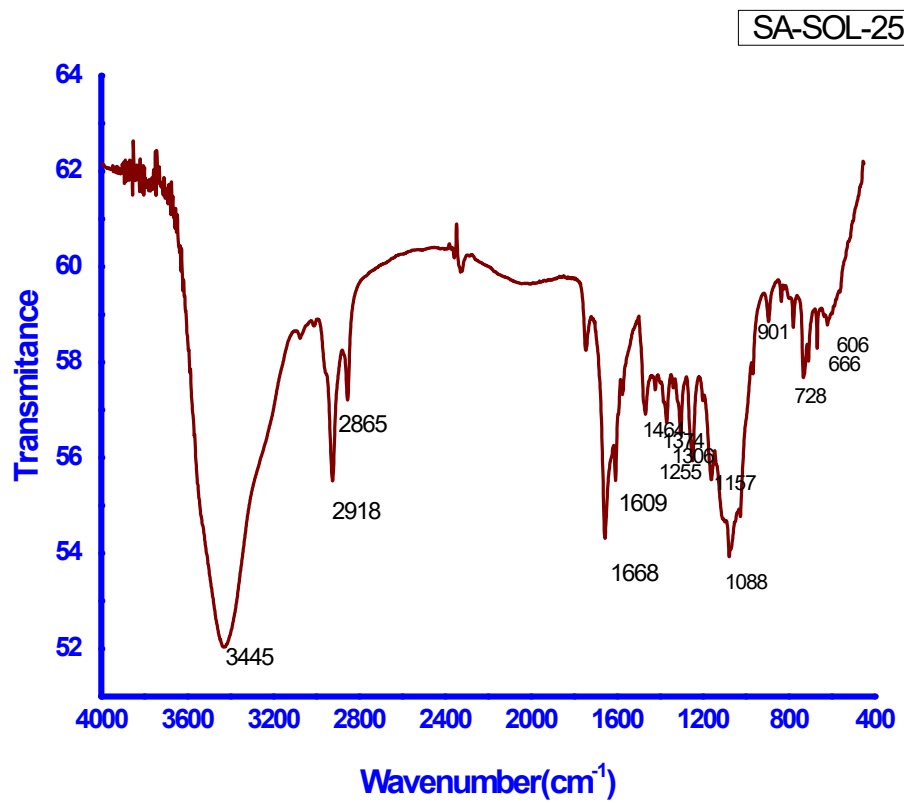

**Fig. S3.** FT-IR spectrum of hydrazone-based ligand ( $\text{H}_2\text{L}^2$ ).

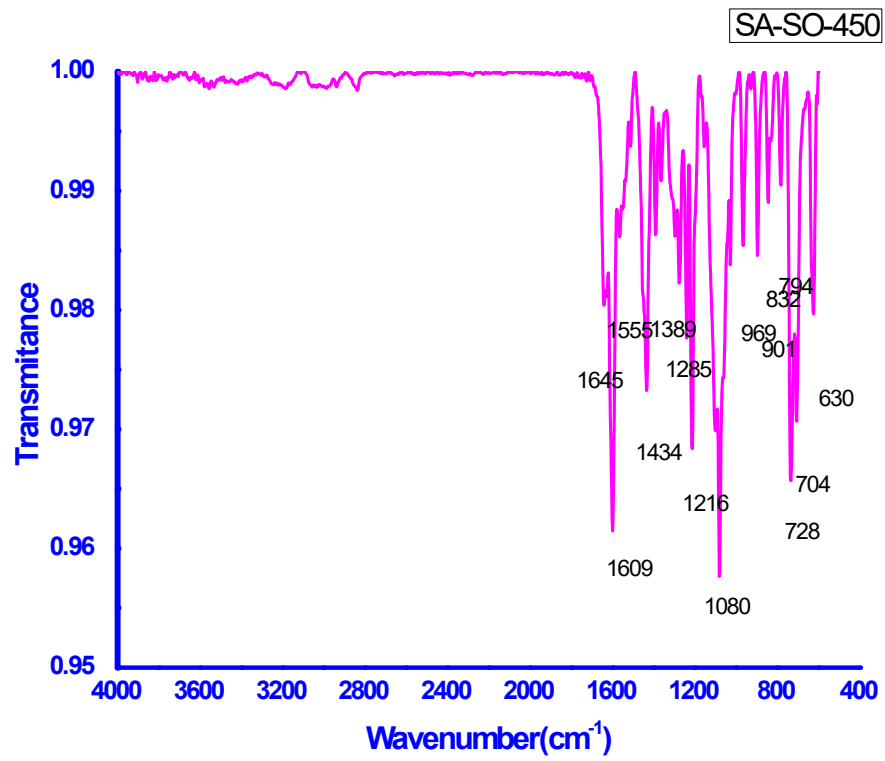

**Fig. S4** FT-IR spectrum of Pb(II) complex **2**.

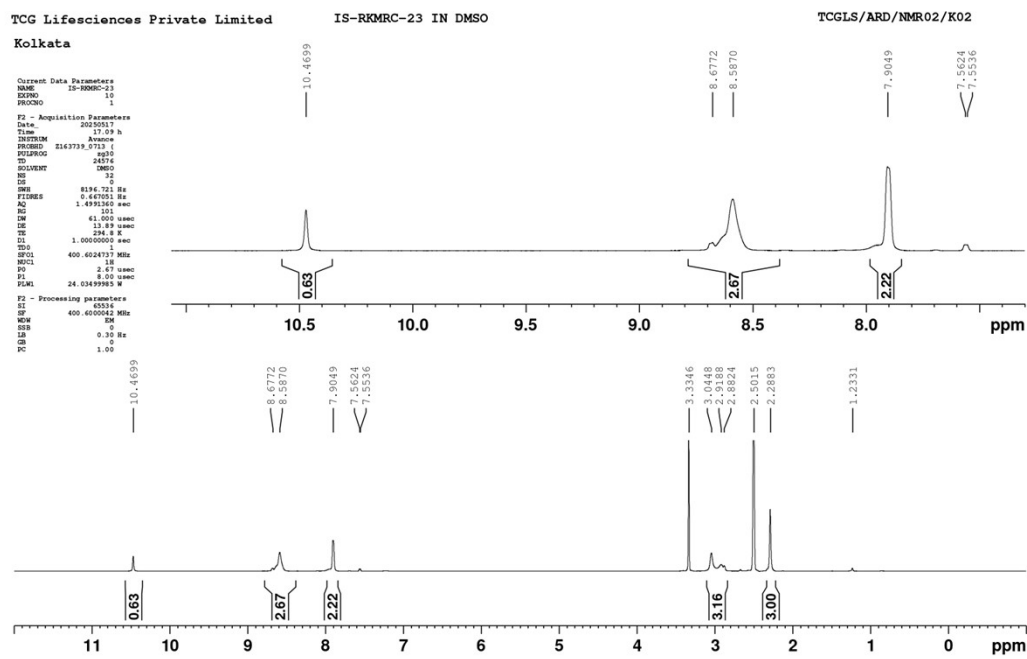

CONFIDENTIAL

Fig. S5  $^1\text{H}$  NMR spectrum of Pb(II) complex **1** in  $\text{DMSO-}d_6$ .

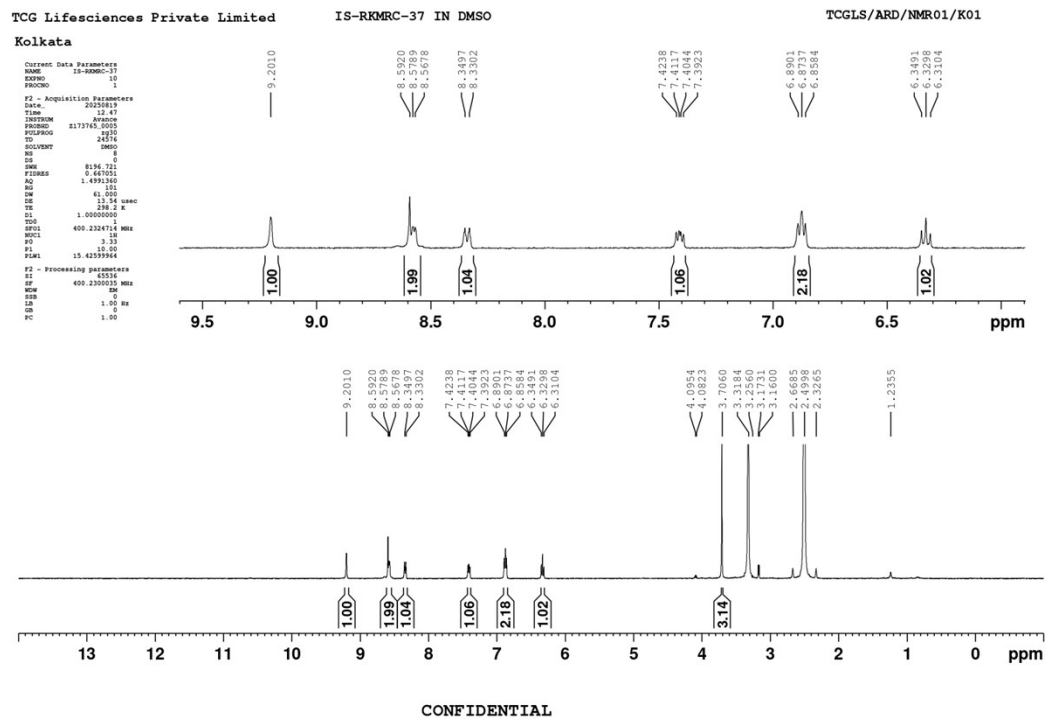

Fig. S6  $^1\text{H}$  NMR spectrum of Pb(II) complex **2** in  $\text{DMSO-}d_6$ .

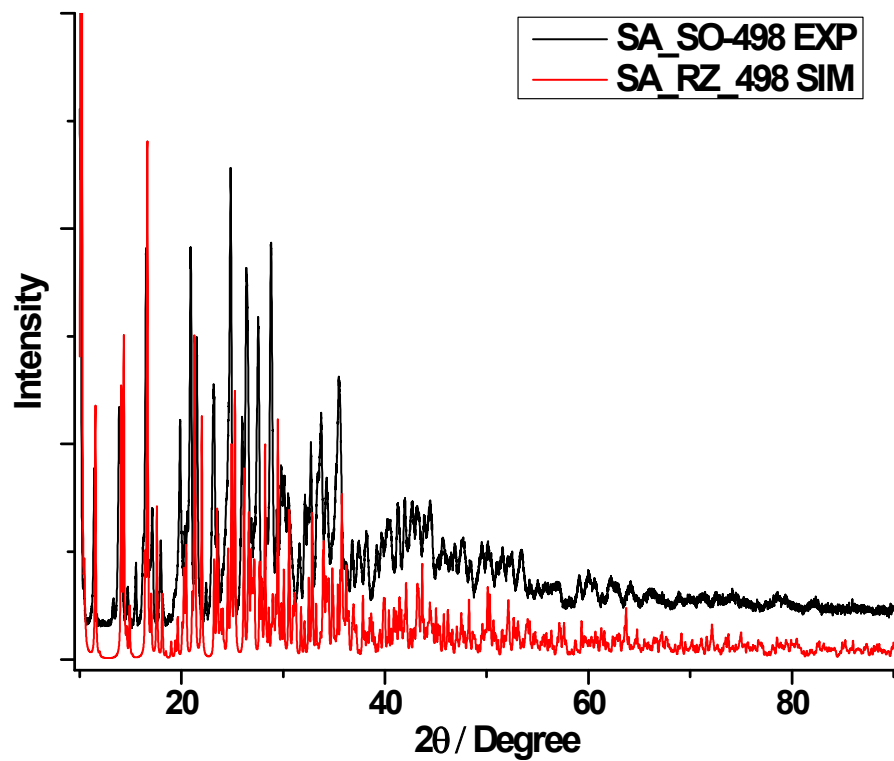

**Fig. S7** Powder X-ray diffraction pattern of Pb(II) complex **1**. The red line represents the pattern simulated from the CIF and the black line represents the experimental pattern.

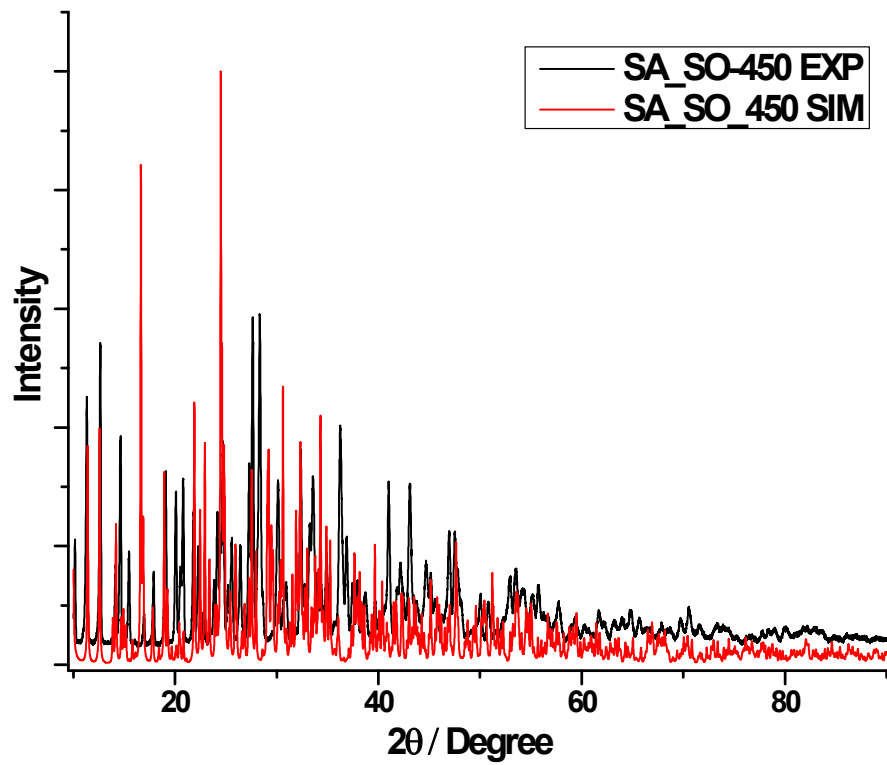

**Fig. S8** Powder X-ray diffraction pattern of Pb(II) complex **2**. The red line represents the pattern simulated from the CIF and the black line represents the experimental pattern.
